# Supplementary material
Source: publisher figshare collection journal article supplement (https://rs.figshare.com/ndownloader/files/30664190)
Supplement: Supplementary file 1 [file 30664190]

Supplementary Table 1. Number of authors and number of authors with at least 1 COVID-19-related publication. Data are limited to authors who have published anything that is Scopus-indexed in January 1, 2020 to August 1, 2021 and who have also authored in their entire career at least 5 Scopus-indexed papers that are classified as articles, reviews or conference papers, by the end of July 2021. Of a total of 2,989,810 such authors, 211,894 had at least one published and indexed COVID-19 paper. The Table shows data on 2,987,454 and 211,685 authors who can be classified in a subfield (the most common subfield for the papers that they have published in their career).

| SUBFIELD | FIELD | Number of authors | Authors with COVID-19 paper(s) | % |
| --- | --- | --- | --- | --- |
| Clinical Medicine | Emergency & Critical Care Medicine | 17450 | 6457 | 37.0% |
| Clinical Medicine | Anesthesiology | 18365 | 6235 | 34.0% |
| Biomedical Research | Virology | 31279 | 10069 | 32.2% |
| Public Health & Health Services | Epidemiology | 3830 | 1176 | 30.7% |
| Philosophy & Theology | Applied Ethics | 2696 | 819 | 30.4% |
| Clinical Medicine | Respiratory System | 27030 | 7744 | 28.6% |
| Clinical Medicine | General & Internal Medicine | 54981 | 15639 | 28.4% |
| Clinical Medicine | Allergy | 7147 | 1978 | 27.7% |
| Information & Communication Technologies | Medical Informatics | 6807 | 1854 | 27.2% |
| Public Health & Health Services | Public Health | 31577 | 8220 | 26.0% |
| Clinical Medicine | Geriatrics | 5129 | 1301 | 25.4% |
| Biomedical Research | Microbiology | 80988 | 18518 | 22.9% |
| Clinical Medicine | Surgery | 43798 | 9825 | 22.4% |
| Clinical Medicine | Environmental & Occupational Health | 4607 | 1028 | 22.3% |
| Clinical Medicine | Psychiatry | 32338 | 7073 | 21.9% |
| Public Health & Health Services | Health Policy & Services | 9442 | 2055 | 21.8% |
| Clinical Medicine | Cardiovascular System & Hematology | 84330 | 18264 | 21.7% |
| Clinical Medicine | Pediatrics | 25686 | 5533 | 21.5% |
| Clinical Medicine | Arthritis & Rheumatology | 17528 | 3766 | 21.5% |
| Clinical Medicine | General Clinical Medicine | 5734 | 1224 | 21.3% |
| Economics & Business | Sport, Leisure & Tourism | 4656 | 983 | 21.1% |
| Clinical Medicine | Tropical Medicine | 15754 | 3298 | 20.9% |
| Public Health & Health Services | Gerontology | 4879 | 1021 | 20.9% |
| Public Health & Health Services | Substance Abuse | 6762 | 1392 | 20.6% |
| Public Health & Health Services | Nursing | 19314 | 3899 | 20.2% |
| Clinical Medicine | Urology & Nephrology | 32902 | 6460 | 19.6% |
| Clinical Medicine | Otorhinolaryngology | 16486 | 3179 | 19.3% |
| Clinical Medicine | Immunology | 60939 | 11541 | 18.9% |
| Clinical Medicine | Gastroenterology & Hepatology | 38200 | 7231 | 18.9% |
| Social Sciences | Demography | 1536 | 285 | 18.6% |
| Enabling & Strategic Technologies | Bioinformatics | 10688 | 1960 | 18.3% |
| Clinical Medicine | Dermatology & Venereal Diseases | 19581 | 3551 | 18.1% |
| Psychology & Cognitive Sciences | Clinical Psychology | 6288 | 1130 | 18.0% |
| Psychology & Cognitive Sciences | Social Psychology | 10349 | 1797 | 17.4% |
| Economics & Business | Development Studies | 2071 | 348 | 16.8% |
| Social Sciences | Social Work | 3559 | 598 | 16.8% |
| Clinical Medicine | Obstetrics & Reproductive Medicine | 33013 | 5197 | 15.7% |
| Economics & Business | Economics | 23629 | 3712 | 15.7% |
| Social Sciences | Political Science & Public Administration | 10721 | 1564 | 14.6% |
| Social Sciences | Information & Library Sciences | 4355 | 622 | 14.3% |
| Clinical Medicine | Nuclear Medicine & Medical Imaging | 44468 | 6295 | 14.2% |
| Clinical Medicine | Endocrinology & Metabolism | 36724 | 5163 | 14.1% |
| Social Sciences | Law | 4554 | 631 | 13.9% |
| Communication & Textual Studies | Communication & Media Studies | 5888 | 815 | 13.8% |
| Economics & Business | Agricultural Economics & Policy | 3001 | 415 | 13.8% |
| Clinical Medicine | Legal & Forensic Medicine | 5364 | 740 | 13.8% |
| Social Sciences | Family Studies | 1456 | 196 | 13.5% |
| Public Health & Health Services | Rehabilitation | 12265 | 1576 | 12.8% |
| Economics & Business | Industrial Relations | 1048 | 130 | 12.4% |
| Clinical Medicine | Complementary & Alternative Medicine | 6006 | 744 | 12.4% |
| Mathematics & Statistics | Statistics & Probability | 11867 | 1468 | 12.4% |
| Clinical Medicine | Neurology & Neurosurgery | 139702 | 17148 | 12.3% |
| Clinical Medicine | Oncology & Carcinogenesis | 157097 | 18969 | 12.1% |
| Clinical Medicine | Ophthalmology & Optometry | 27337 | 3297 | 12.1% |
| Clinical Medicine | Pharmacology & Pharmacy | 48853 | 5885 | 12.0% |
| Economics & Business | Business & Management | 25629 | 3081 | 12.0% |
| Clinical Medicine | Sport Sciences | 15621 | 1870 | 12.0% |
| Clinical Medicine | Pathology | 8201 | 981 | 12.0% |
| Psychology & Cognitive Sciences | Developmental & Child Psychology | 9494 | 1131 | 11.9% |
| Economics & Business | Finance | 6730 | 801 | 11.9% |
| Biomedical Research | Nutrition & Dietetics | 20195 | 2358 | 11.7% |
| Social Sciences | Sociology | 4802 | 555 | 11.6% |
| Clinical Medicine | Dentistry | 30160 | 3474 | 11.5% |
| Biomedical Research | Toxicology | 22084 | 2498 | 11.3% |
| Social Sciences | Criminology | 5429 | 611 | 11.3% |
| Psychology & Cognitive Sciences | General Psychology & Cognitive Sciences | 1409 | 158 | 11.2% |
| Built Environment & Design | Urban & Regional Planning | 5627 | 618 | 11.0% |
| Economics & Business | Econometrics | 757 | 82 | 10.8% |
| Social Sciences | Science Studies | 2135 | 227 | 10.6% |
| Biomedical Research | Biophysics | 6854 | 714 | 10.4% |
| Information & Communication Technologies | Information Systems | 7648 | 789 | 10.3% |
| Social Sciences | Gender Studies | 1060 | 109 | 10.3% |
| Clinical Medicine | Orthopedics | 34468 | 3508 | 10.2% |
| Social Sciences | International Relations | 3396 | 342 | 10.1% |
| Social Sciences | Education | 34723 | 3476 | 10.0% |
| Economics & Business | Marketing | 6675 | 657 | 9.8% |
| Biomedical Research | Developmental Biology | 70598 | 6807 | 9.6% |
| Social Sciences | Geography | 7930 | 747 | 9.4% |
| Psychology & Cognitive Sciences | Human Factors | 6657 | 581 | 8.7% |
| Biomedical Research | Biochemistry & Molecular Biology | 60891 | 5305 | 8.7% |
| Social Sciences | Social Sciences Methods | 1237 | 107 | 8.6% |
| Biomedical Research | Genetics & Heredity | 17049 | 1455 | 8.5% |
| Chemistry | Medicinal & Biomolecular Chemistry | 38993 | 3317 | 8.5% |
| Psychology & Cognitive Sciences | Psychoanalysis | 917 | 77 | 8.4% |
| Psychology & Cognitive Sciences | Experimental Psychology | 15882 | 1309 | 8.2% |
| Economics & Business | Logistics & Transportation | 12194 | 978 | 8.0% |
| Biomedical Research | Anatomy & Morphology | 2479 | 194 | 7.8% |
| Economics & Business | Accounting | 3027 | 234 | 7.7% |
| Engineering | Operations Research | 13389 | 1030 | 7.7% |
| Historical Studies | History of Science, Technology & Medicine | 904 | 67 | 7.4% |
| Enabling & Strategic Technologies | Strategic, Defence & Security Studies | 8405 | 585 | 7.0% |
| Information & Communication Technologies | Artificial Intelligence & Image Processing | 142567 | 9845 | 6.9% |
| Biomedical Research | Physiology | 7784 | 528 | 6.8% |
| Agriculture, Fisheries & Forestry | Veterinary Sciences | 23531 | 1524 | 6.5% |
| Historical Studies | Anthropology | 3897 | 252 | 6.5% |
| Earth & Environmental Sciences | Meteorology & Atmospheric Sciences | 35410 | 2248 | 6.3% |
| Philosophy & Theology | Religions & Theology | 3158 | 198 | 6.3% |
| Earth & Environmental Sciences | Environmental Sciences | 47276 | 2753 | 5.8% |
| Social Sciences | Cultural Studies | 2536 | 146 | 5.8% |
| Mathematics & Statistics | Applied Mathematics | 9353 | 530 | 5.7% |
| Engineering | Biomedical Engineering | 25948 | 1457 | 5.6% |
| Economics & Business | Economic Theory | 985 | 55 | 5.6% |
| Historical Studies | History of Social Sciences | 920 | 50 | 5.4% |
| Public Health & Health Services | Speech-Language Pathology & Audiology | 4797 | 252 | 5.3% |
| Visual & Performing Arts | Drama & Theater | 425 | 22 | 5.2% |
| Physics & Astronomy | Fluids & Plasmas | 22311 | 1135 | 5.1% |
| Biomedical Research | Mycology & Parasitology | 11507 | 582 | 5.1% |
| Psychology & Cognitive Sciences | Behavioral Science & Comparative Psychology | 5137 | 254 | 4.9% |
| Chemistry | Analytical Chemistry | 42847 | 2074 | 4.8% |
| Visual & Performing Arts | Folklore | 191 | 9 | 4.7% |
| Enabling & Strategic Technologies | Biotechnology | 24957 | 1111 | 4.5% |
| Information & Communication Technologies | Software Engineering | 8525 | 375 | 4.4% |
| Information & Communication Technologies | Distributed Computing | 3886 | 167 | 4.3% |
| Built Environment & Design | Architecture | 471 | 20 | 4.2% |
| Biology | Evolutionary Biology | 15692 | 664 | 4.2% |
| Built Environment & Design | Building & Construction | 16833 | 703 | 4.2% |
| Biology | Ecology | 34062 | 1415 | 4.2% |
| Physics & Astronomy | Mathematical Physics | 2607 | 107 | 4.1% |
| Information & Communication Technologies | Computation Theory & Mathematics | 10330 | 398 | 3.9% |
| Communication & Textual Studies | Languages & Linguistics | 8025 | 301 | 3.8% |
| Physics & Astronomy | Chemical Physics | 36046 | 1347 | 3.7% |
| Information & Communication Technologies | Networking & Telecommunications | 79790 | 2943 | 3.7% |
| Mathematics & Statistics | Numerical & Computational Mathematics | 7748 | 283 | 3.7% |
| Built Environment & Design | Design Practice & Management | 3770 | 130 | 3.4% |
| Engineering | Geological & Geomatics Engineering | 28983 | 990 | 3.4% |
| Philosophy & Theology | Philosophy | 5071 | 162 | 3.2% |
| Engineering | Environmental Engineering | 22962 | 721 | 3.1% |
| Chemistry | Organic Chemistry | 56522 | 1724 | 3.1% |
| Agriculture, Fisheries & Forestry | Food Science | 32581 | 966 | 3.0% |
| Visual & Performing Arts | Music | 877 | 25 | 2.9% |
| Engineering | Industrial Engineering & Automation | 45450 | 1249 | 2.7% |
| Chemistry | General Chemistry | 15466 | 419 | 2.7% |
| Enabling & Strategic Technologies | Nanoscience & Nanotechnology | 60423 | 1559 | 2.6% |
| Biomedical Research | Microscopy | 1061 | 26 | 2.5% |
| Historical Studies | History | 4672 | 112 | 2.4% |
| Communication & Textual Studies | Literary Studies | 5129 | 114 | 2.2% |
| Visual & Performing Arts | Art Practice, History & Theory | 630 | 14 | 2.2% |
| Agriculture, Fisheries & Forestry | Fisheries | 17676 | 371 | 2.1% |
| Agriculture, Fisheries & Forestry | Dairy & Animal Science | 28047 | 582 | 2.1% |
| Physics & Astronomy | Acoustics | 12355 | 256 | 2.1% |
| Engineering | Chemical Engineering | 27625 | 561 | 2.0% |
| Biology | Plant Biology & Botany | 72793 | 1445 | 2.0% |
| Enabling & Strategic Technologies | Energy | 99364 | 1939 | 2.0% |
| Information & Communication Technologies | Computer Hardware & Architecture | 6762 | 131 | 1.9% |
| Biology | Marine Biology & Hydrobiology | 22647 | 431 | 1.9% |
| Chemistry | Inorganic & Nuclear Chemistry | 24930 | 452 | 1.8% |
| Biology | Ornithology | 3069 | 52 | 1.7% |
| Chemistry | Polymers | 36114 | 610 | 1.7% |
| Physics & Astronomy | Nuclear & Particle Physics | 64338 | 1060 | 1.6% |
| Physics & Astronomy | General Physics | 28868 | 425 | 1.5% |
| Agriculture, Fisheries & Forestry | Forestry | 13055 | 190 | 1.5% |
| Biology | Zoology | 8839 | 126 | 1.4% |
| Engineering | Mechanical Engineering & Transports | 49806 | 703 | 1.4% |
| Mathematics & Statistics | General Mathematics | 33053 | 445 | 1.3% |
| Biology | Entomology | 13927 | 179 | 1.3% |
| Agriculture, Fisheries & Forestry | Agronomy & Agriculture | 33649 | 429 | 1.3% |
| Engineering | Electrical & Electronic Engineering | 40279 | 510 | 1.3% |
| Enabling & Strategic Technologies | Optoelectronics & Photonics | 33331 | 412 | 1.2% |
| Historical Studies | Archaeology | 7423 | 90 | 1.2% |
| Physics & Astronomy | Optics | 31997 | 385 | 1.2% |
| Earth & Environmental Sciences | Oceanography | 7323 | 88 | 1.2% |
| Enabling & Strategic Technologies | Materials | 113262 | 1110 | 1.0% |
| Engineering | Aerospace & Aeronautics | 17493 | 163 | 0.9% |
| Engineering | Mining & Metallurgy | 10209 | 95 | 0.9% |
| Physics & Astronomy | Astronomy & Astrophysics | 27036 | 251 | 0.9% |
| Physics & Astronomy | Applied Physics | 96801 | 893 | 0.9% |
| Earth & Environmental Sciences | Geochemistry & Geophysics | 41248 | 367 | 0.9% |
| Engineering | Civil Engineering | 23294 | 203 | 0.9% |
| Chemistry | Physical Chemistry | 15280 | 126 | 0.8% |
| Agriculture, Fisheries & Forestry | Horticulture | 2327 | 19 | 0.8% |
| Historical Studies | Classics | 989 | 8 | 0.8% |
| Earth & Environmental Sciences | Paleontology | 11219 | 63 | 0.6% |
| Earth & Environmental Sciences | Geology | 6440 | 23 | 0.4% |
| Engineering | Automobile Design & Engineering | 543 | 1 | 0.2% |

Supplementary Table 2. Number of influential authors and number of them who had at least 1 COVID-19-related publication. The construct is similar to Supplementary Table 1, but is limited to those authors who are the top 2% of their subfield for their career-long work based on a composite citation indicator.

| SUBFIELD | FIELD | Number of authors | Authors with COVID-19 paper(s) | % |
| --- | --- | --- | --- | --- |
| Clinical Medicine | Emergency & Critical Care Medicine | 523 | 337 | 64.4% |
| Philosophy & Theology | Applied Ethics | 83 | 50 | 60.2% |
| Clinical Medicine | Allergy | 256 | 151 | 59.0% |
| Biomedical Research | Virology | 992 | 549 | 55.3% |
| Clinical Medicine | Geriatrics | 169 | 87 | 51.5% |
| Information & Communication Technologies | Medical Informatics | 214 | 108 | 50.5% |
| Clinical Medicine | Respiratory System | 933 | 469 | 50.3% |
| Clinical Medicine | General & Internal Medicine | 2554 | 1277 | 50.0% |
| Clinical Medicine | General Clinical Medicine | 214 | 103 | 48.1% |
| Economics & Business | Sport, Leisure & Tourism | 118 | 55 | 46.6% |
| Public Health & Health Services | Public Health | 924 | 416 | 45.0% |
| Public Health & Health Services | Health Policy & Services | 313 | 138 | 44.1% |
| Clinical Medicine | Arthritis & Rheumatology | 522 | 230 | 44.1% |
| Clinical Medicine | Cardiovascular System & Hematology | 2974 | 1304 | 43.8% |
| Public Health & Health Services | Gerontology | 157 | 66 | 42.0% |
| Clinical Medicine | Tropical Medicine | 471 | 197 | 41.8% |
| Clinical Medicine | Gastroenterology & Hepatology | 1380 | 554 | 40.1% |
| Public Health & Health Services | Epidemiology | 150 | 60 | 40.0% |
| Clinical Medicine | Surgery | 1499 | 579 | 38.6% |
| Clinical Medicine | Immunology | 2019 | 771 | 38.2% |
| Clinical Medicine | Psychiatry | 1100 | 416 | 37.8% |
| Clinical Medicine | Dermatology & Venereal Diseases | 678 | 255 | 37.6% |
| Clinical Medicine | Anesthesiology | 660 | 248 | 37.6% |
| Enabling & Strategic Technologies | Bioinformatics | 337 | 124 | 36.8% |
| Clinical Medicine | Pediatrics | 865 | 311 | 36.0% |
| Clinical Medicine | Environmental & Occupational Health | 212 | 76 | 35.8% |
| Public Health & Health Services | Substance Abuse | 221 | 77 | 34.8% |
| Biomedical Research | Microbiology | 2430 | 827 | 34.0% |
| Economics & Business | Agricultural Economics & Policy | 99 | 33 | 33.3% |
| Psychology & Cognitive Sciences | Clinical Psychology | 249 | 83 | 33.3% |
| Economics & Business | Development Studies | 64 | 21 | 32.8% |
| Clinical Medicine | Urology & Nephrology | 1147 | 366 | 31.9% |
| Public Health & Health Services | Nursing | 1135 | 357 | 31.5% |
| Clinical Medicine | Complementary & Alternative Medicine | 156 | 47 | 30.1% |
| Psychology & Cognitive Sciences | Social Psychology | 298 | 88 | 29.5% |
| Clinical Medicine | Otorhinolaryngology | 522 | 153 | 29.3% |
| Clinical Medicine | Obstetrics & Reproductive Medicine | 1186 | 345 | 29.1% |
| Clinical Medicine | Endocrinology & Metabolism | 1254 | 364 | 29.0% |
| Public Health & Health Services | Rehabilitation | 357 | 98 | 27.5% |
| Mathematics & Statistics | Statistics & Probability | 297 | 80 | 26.9% |
| Communication & Textual Studies | Communication & Media Studies | 164 | 44 | 26.8% |
| Clinical Medicine | Oncology & Carcinogenesis | 4188 | 1118 | 26.7% |
| Clinical Medicine | Nuclear Medicine & Medical Imaging | 1453 | 372 | 25.6% |
| Social Sciences | Social Work | 105 | 26 | 24.8% |
| Clinical Medicine | Pathology | 303 | 74 | 24.4% |
| Social Sciences | Political Science & Public Administration | 286 | 69 | 24.1% |
| Clinical Medicine | Sport Sciences | 424 | 101 | 23.8% |
| Social Sciences | Geography | 257 | 60 | 23.3% |
| Social Sciences | Science Studies | 60 | 14 | 23.3% |
| Clinical Medicine | Pharmacology & Pharmacy | 1570 | 363 | 23.1% |
| Economics & Business | Economics | 623 | 144 | 23.1% |
| Clinical Medicine | Ophthalmology & Optometry | 928 | 211 | 22.7% |
| Social Sciences | Family Studies | 44 | 10 | 22.7% |
| Chemistry | Medicinal & Biomolecular Chemistry | 1255 | 283 | 22.5% |
| Social Sciences | Information & Library Sciences | 142 | 32 | 22.5% |
| Biomedical Research | Nutrition & Dietetics | 616 | 138 | 22.4% |
| Clinical Medicine | Legal & Forensic Medicine | 180 | 40 | 22.2% |
| Information & Communication Technologies | Information Systems | 296 | 64 | 21.6% |
| Social Sciences | Sociology | 136 | 29 | 21.3% |
| Clinical Medicine | Neurology & Neurosurgery | 4332 | 923 | 21.3% |
| Psychology & Cognitive Sciences | Human Factors | 226 | 48 | 21.2% |
| Economics & Business | Industrial Relations | 33 | 7 | 21.2% |
| Economics & Business | Business & Management | 714 | 150 | 21.0% |
| Psychology & Cognitive Sciences | Developmental & Child Psychology | 312 | 64 | 20.5% |
| Clinical Medicine | Dentistry | 857 | 172 | 20.1% |
| Economics & Business | Logistics & Transportation | 384 | 77 | 20.1% |
| Social Sciences | Demography | 40 | 8 | 20.0% |
| Enabling & Strategic Technologies | Strategic, Defence & Security Studies | 264 | 52 | 19.7% |
| Built Environment & Design | Urban & Regional Planning | 155 | 30 | 19.4% |
| Biomedical Research | Genetics & Heredity | 539 | 102 | 18.9% |
| Biomedical Research | Toxicology | 719 | 134 | 18.6% |
| Historical Studies | History of Science, Technology & Medicine | 27 | 5 | 18.5% |
| Biomedical Research | Developmental Biology | 2051 | 379 | 18.5% |
| Clinical Medicine | Orthopedics | 894 | 165 | 18.5% |
| Economics & Business | Marketing | 198 | 36 | 18.2% |
| Social Sciences | Cultural Studies | 68 | 12 | 17.6% |
| Psychology & Cognitive Sciences | General Psychology & Cognitive Sciences | 47 | 8 | 17.0% |
| Biomedical Research | Biophysics | 263 | 44 | 16.7% |
| Psychology & Cognitive Sciences | Psychoanalysis | 30 | 5 | 16.7% |
| Social Sciences | Law | 128 | 21 | 16.4% |
| Agriculture, Fisheries & Forestry | Veterinary Sciences | 702 | 115 | 16.4% |
| Economics & Business | Economic Theory | 19 | 3 | 15.8% |
| Biomedical Research | Biochemistry & Molecular Biology | 2381 | 372 | 15.6% |
| Earth & Environmental Sciences | Environmental Sciences | 1267 | 194 | 15.3% |
| Engineering | Operations Research | 400 | 61 | 15.3% |
| Social Sciences | Criminology | 172 | 26 | 15.1% |
| Economics & Business | Accounting | 80 | 12 | 15.0% |
| Biomedical Research | Physiology | 315 | 47 | 14.9% |
| Information & Communication Technologies | Distributed Computing | 149 | 22 | 14.8% |
| Physics & Astronomy | Fluids & Plasmas | 778 | 113 | 14.5% |
| Earth & Environmental Sciences | Meteorology & Atmospheric Sciences | 1048 | 150 | 14.3% |
| Information & Communication Technologies | Artificial Intelligence & Image Processing | 4233 | 599 | 14.2% |
| Biomedical Research | Mycology & Parasitology | 327 | 46 | 14.1% |
| Chemistry | Analytical Chemistry | 1500 | 198 | 13.2% |
| Biology | Evolutionary Biology | 444 | 57 | 12.8% |
| Economics & Business | Finance | 175 | 22 | 12.6% |
| Mathematics & Statistics | Applied Mathematics | 275 | 34 | 12.4% |
| Social Sciences | Education | 1007 | 121 | 12.0% |
| Biomedical Research | Anatomy & Morphology | 75 | 9 | 12.0% |
| Engineering | Biomedical Engineering | 972 | 116 | 11.9% |
| Enabling & Strategic Technologies | Biotechnology | 784 | 89 | 11.4% |
| Psychology & Cognitive Sciences | Experimental Psychology | 439 | 49 | 11.2% |
| Economics & Business | Econometrics | 18 | 2 | 11.1% |
| Historical Studies | Anthropology | 117 | 13 | 11.1% |
| Social Sciences | International Relations | 102 | 11 | 10.8% |
| Built Environment & Design | Building & Construction | 484 | 52 | 10.7% |
| Social Sciences | Gender Studies | 28 | 3 | 10.7% |
| Biology | Ecology | 922 | 96 | 10.4% |
| Information & Communication Technologies | Software Engineering | 338 | 35 | 10.4% |
| Enabling & Strategic Technologies | Nanoscience & Nanotechnology | 1720 | 170 | 9.9% |
| Information & Communication Technologies | Networking & Telecommunications | 2748 | 269 | 9.8% |
| Philosophy & Theology | Religions & Theology | 98 | 9 | 9.2% |
| Visual & Performing Arts | Drama & Theater | 11 | 1 | 9.1% |
| Public Health & Health Services | Speech-Language Pathology & Audiology | 150 | 13 | 8.7% |
| Engineering | Industrial Engineering & Automation | 1562 | 134 | 8.6% |
| Philosophy & Theology | Philosophy | 133 | 11 | 8.3% |
| Communication & Textual Studies | Languages & Linguistics | 220 | 18 | 8.2% |
| Agriculture, Fisheries & Forestry | Food Science | 846 | 63 | 7.4% |
| Physics & Astronomy | Chemical Physics | 1286 | 94 | 7.3% |
| Agriculture, Fisheries & Forestry | Fisheries | 443 | 32 | 7.2% |
| Historical Studies | Archaeology | 198 | 14 | 7.1% |
| Historical Studies | History | 101 | 7 | 6.9% |
| Engineering | Environmental Engineering | 751 | 52 | 6.9% |
| Engineering | Geological & Geomatics Engineering | 815 | 56 | 6.9% |
| Chemistry | Organic Chemistry | 2037 | 133 | 6.5% |
| Built Environment & Design | Architecture | 16 | 1 | 6.3% |
| Physics & Astronomy | Mathematical Physics | 83 | 5 | 6.0% |
| Information & Communication Technologies | Computer Hardware & Architecture | 288 | 17 | 5.9% |
| Mathematics & Statistics | Numerical & Computational Mathematics | 223 | 13 | 5.8% |
| Communication & Textual Studies | Literary Studies | 160 | 9 | 5.6% |
| Enabling & Strategic Technologies | Energy | 3438 | 193 | 5.6% |
| Engineering | Chemical Engineering | 941 | 51 | 5.4% |
| Built Environment & Design | Design Practice & Management | 139 | 7 | 5.0% |
| Biology | Entomology | 417 | 21 | 5.0% |
| Biology | Marine Biology & Hydrobiology | 621 | 30 | 4.8% |
| Chemistry | Polymers | 1371 | 63 | 4.6% |
| Biology | Ornithology | 90 | 4 | 4.4% |
| Biology | Plant Biology & Botany | 1951 | 80 | 4.1% |
| Agriculture, Fisheries & Forestry | Agronomy & Agriculture | 835 | 34 | 4.1% |
| Agriculture, Fisheries & Forestry | Dairy & Animal Science | 699 | 28 | 4.0% |
| Engineering | Mechanical Engineering & Transports | 1512 | 59 | 3.9% |
| Physics & Astronomy | Optics | 1080 | 38 | 3.5% |
| Engineering | Electrical & Electronic Engineering | 1554 | 53 | 3.4% |
| Physics & Astronomy | Acoustics | 417 | 14 | 3.4% |
| Chemistry | General Chemistry | 479 | 16 | 3.3% |
| Information & Communication Technologies | Computation Theory & Mathematics | 275 | 9 | 3.3% |
| Chemistry | Inorganic & Nuclear Chemistry | 940 | 30 | 3.2% |
| Mathematics & Statistics | General Mathematics | 862 | 27 | 3.1% |
| Social Sciences | Social Sciences Methods | 32 | 1 | 3.1% |
| Physics & Astronomy | General Physics | 1020 | 31 | 3.0% |
| Visual & Performing Arts | Music | 33 | 1 | 3.0% |
| Engineering | Civil Engineering | 708 | 19 | 2.7% |
| Physics & Astronomy | Astronomy & Astrophysics | 822 | 22 | 2.7% |
| Agriculture, Fisheries & Forestry | Forestry | 403 | 10 | 2.5% |
| Enabling & Strategic Technologies | Optoelectronics & Photonics | 1289 | 31 | 2.4% |
| Physics & Astronomy | Applied Physics | 3718 | 85 | 2.3% |
| Biomedical Research | Microscopy | 45 | 1 | 2.2% |
| Enabling & Strategic Technologies | Materials | 3855 | 77 | 2.0% |
| Biology | Zoology | 207 | 4 | 1.9% |
| Chemistry | Physical Chemistry | 505 | 9 | 1.8% |
| Psychology & Cognitive Sciences | Behavioral Science & Comparative Psychology | 169 | 3 | 1.8% |
| Physics & Astronomy | Nuclear & Particle Physics | 2112 | 35 | 1.7% |
| Engineering | Mining & Metallurgy | 370 | 6 | 1.6% |
| Earth & Environmental Sciences | Paleontology | 317 | 5 | 1.6% |
| Earth & Environmental Sciences | Geochemistry & Geophysics | 1206 | 19 | 1.6% |
| Engineering | Aerospace & Aeronautics | 650 | 10 | 1.5% |
| Earth & Environmental Sciences | Oceanography | 201 | 3 | 1.5% |
| Earth & Environmental Sciences | Geology | 203 | 1 | 0.5% |
| Visual & Performing Arts | Art Practice, History & Theory | 12 | 0 | 0.0% |
| Engineering | Automobile Design & Engineering | 27 | 0 | 0.0% |
| Historical Studies | Classics | 27 | 0 | 0.0% |
| Visual & Performing Arts | Folklore | 3 | 0 | 0.0% |
| Historical Studies | History of Social Sciences | 25 | 0 | 0.0% |
| Agriculture, Fisheries & Forestry | Horticulture | 64 | 0 | 0.0% |

Supplementary Table 3. Scientists with highest composite citation indicator based on their COVID-19 publications indexed in Scopus as of August 1, 2021 (in order of ranking per the composite indicator).

| AUTHOR | INSTITUTION | COUNTRY | MOST COMMON SUBFIELD | SECOND MOST COMMON SUBFIELD |
| --- | --- | --- | --- | --- |
| Lu, Hongzhou | Fudan University | China | Microbiology | Oncology & Carcinogenesis |
| Henry, Brandon Michael | Cincinnati Children's Hospital Medical Center | United States | Surgery | Cardiovascular System & Hematology |
| Thachil, Jecko | The University of Manchester | United Kingdom | Cardiovascular System & Hematology | Immunology |
| Lippi, Giuseppe | Università degli Studi di Verona | Italy | General Clinical Medicine | Cardiovascular System & Hematology |
| Krammer, Florian | Icahn School of Medicine at Mount Sinai | United States | Virology | Immunology |
| Tang, Ning | Tongji Medical College | China | Cardiovascular System & Hematology | General Clinical Medicine |
| Elfiky, Abdo A. | Cairo University | Egypt | Virology | Biophysics |
| Lipsitch, Marc | Harvard T.H. Chan School of Public Health | United States | Microbiology | Epidemiology |
| Perlman, Stanley | University of Iowa | United States | Virology | Immunology |
| Ludvigsson, Jonas F. | Karolinska Institutet | Sweden | Gastroenterology & Hepatology | General & Internal Medicine |
| Graham, Barney S. | National Institute of Allergy and Infectious Diseases (NIAID) | United States | Immunology | Virology |
| Yancy, Clyde | Northwestern University Feinberg School of Medicine | United States | Cardiovascular System & Hematology | General & Internal Medicine |
| Ivanov, Dmitry | Hochschule für Wirtschaft und Recht Berlin | Germany | Operations Research | Industrial Engineering & Automation |
| Guan, Wei Jie | Guangzhou Medical University | China | Respiratory System | Oncology & Carcinogenesis |
| Jiang, Shibo | Fudan University | China | Microbiology | Developmental Biology |
| Chan, Jasper Fuk Woo | The University of Hong Kong Li Ka Shing Faculty of Medicine | China | Microbiology | Virology |
| Baig, Abdul Mannan | The Aga Khan University | Pakistan | Neurology & Neurosurgery | Microbiology |
| Cao, Bin | China-Japan Friendship Hospital | China | Microbiology | Respiratory System |
| Schwartz, David A. | Medical College of Georgia | United States | Pathology | Microbiology |
| Rajkumar, Ravi Philip | Jawaharlal Institute of Postgraduate Medical Education and Research | India | Psychiatry | Pharmacology & Pharmacy |
| Rodriguez-Morales, Alfonso J. | Fundación Universitaria Autónoma de las Américas | Colombia | Microbiology | Tropical Medicine |
| Cook, T. M. | Royal United Hospitals Bath NHS Foundation Trust | United Kingdom | Anesthesiology | General & Internal Medicine |
| Banerjee, Debanjan | National Institute of Mental Health and Neuro Sciences | India | Psychiatry | Experimental Psychology |
| Iwasaki, A. | Yale School of Medicine | United States | Immunology | Developmental Biology |
| Lee, Sherman A. | Christopher Newport University | United States | Social Psychology | Clinical Psychology |
| Baric, Ralph S. | The University of North Carolina at Chapel Hill | United States | Virology | Microbiology |
| Rezaei, Nima | Research Center for Immunodeficiencies | Iran | Immunology | Allergy |
| Heymann, David | London School of Hygiene & Tropical Medicine | United Kingdom | Tropical Medicine | Microbiology |
| To, Kelvin Kai Wang | The University of Hong Kong, State Key Laboratory of Emerging Infectious Diseases | China | Microbiology | Virology |
| Greenhalgh, Trisha | University of Oxford Medical Sciences Division | United Kingdom | General & Internal Medicine | Public Health |
| Huang, Chaolin | Wuhan Jinyintan Hospital | China | Immunology | General & Internal Medicine |
| Gostin, Lawrence O. | Georgetown Law | United States | Applied Ethics | General & Internal Medicine |
| Ioannidis, John P.A. | Stanford University School of Medicine | United States | General & Internal Medicine | Epidemiology |
| Kanne, Jeffrey P. | University of Wisconsin School of Medicine and Public Health | United States | Nuclear Medicine & Medical Imaging | Respiratory System |
| Levi, Marcel | University College London Hospitals NHS Foundation Trust | United Kingdom | Cardiovascular System & Hematology | General & Internal Medicine |
| Greenberg, Neil | King's College London | United Kingdom | Psychiatry | Environmental & Occupational Health |
| McKee, Martin | London School of Hygiene & Tropical Medicine | United Kingdom | General & Internal Medicine | Public Health |
| Wilder-Smith, Annelies | London School of Hygiene & Tropical Medicine | United Kingdom | Tropical Medicine | Microbiology |
| Koopmans, Marion P.G. | Erasmus MC | Netherlands | Microbiology | Virology |
| Coccia, M. | Consiglio Nazionale delle Ricerche | Italy | Business & Management | Science Studies |
| D’Antiga, Lorenzo | Papa Giovanni XXIII Hospital | Italy | Gastroenterology & Hepatology | Surgery |
| Zhou, Peng | Wuhan Institute of Virology Chinese Academy of Sciences | China | Virology | Microbiology |
| Al-Tawfiq, Jaffar A. | Johns Hopkins Aramco Healthcare | Saudi Arabia | Microbiology | Tropical Medicine |
| Singhal, Tanu | Kokilaben Dhirubhai Ambani Hospital and Medical Research Institute | India | Pediatrics | Microbiology |
| Recalcati, Sebastiano | Azienda Ospedaliera Ospedale Di Lecco | Italy | Dermatology & Venereal Diseases | Immunology |
| Cowling, Benjamin J. | The University of Hong Kong Li Ka Shing Faculty of Medicine | Hong Kong | Microbiology | General & Internal Medicine |
| Wu, Joseph T. | The University of Hong Kong Li Ka Shing Faculty of Medicine | Hong Kong | Microbiology | General & Internal Medicine |
| Kalil, Andre C. | University of Nebraska Medical Center | United States | Microbiology | Surgery |
| Grasselli, Giacomo | Università degli Studi di Milano | Italy | Emergency & Critical Care Medicine | Anesthesiology |
| Li, Taisheng | Peking Union Medical College Hospital | China | Virology | Oncology & Carcinogenesis |
| Fauci, Anthony S. | National Institute of Allergy and Infectious Diseases (NIAID) | United States | Immunology | General & Internal Medicine |
| Gurwitz, David | Tel Aviv University, Sackler Faculty of Medicine | Israel | Pharmacology & Pharmacy | Biochemistry & Molecular Biology |
| Mehra, Mandeep R. | Brigham and Women's Hospital | United States | Cardiovascular System & Hematology | Surgery |
| Zhao, Shi | Chinese University of Hong Kong | Hong Kong | Microbiology | Tropical Medicine |
| Corman, Victor M. | Charité – Universitätsmedizin Berlin | Germany | Microbiology | Virology |
| Young, Barnaby Edward | Tan Tock Seng Hospital | Singapore | Microbiology | General & Internal Medicine |
| Tobias, Aurelio | CSIC - Instituto de Diagnostico Ambiental y Estudios del Agua (IDAEA) | Spain | Toxicology | Environmental Sciences |
| Atangana, A. | University of the Free State | South Africa | Applied Mathematics | Mathematical Physics |
| Plebani, Mario | Azienda Ospedale Università Padova | Italy | General Clinical Medicine | Cardiovascular System & Hematology |
| Pal, Rimesh | Postgraduate Institute of Medical Education & Research, Chandigarh | India | Endocrinology & Metabolism | General & Internal Medicine |
| Hoffmann, Markus | Deutsches Primatenzentrum | Germany | Virology | Developmental Biology |
| Buonsenso, Danilo | Università Cattolica del Sacro Cuore, Campus di Roma | Italy | Pediatrics | Nuclear Medicine & Medical Imaging |
| Gautret, Philippe | Aix Marseille Université | France | Microbiology | Tropical Medicine |
| Leung, Gabriel M. | The University of Hong Kong Li Ka Shing Faculty of Medicine | Hong Kong | Epidemiology | General & Internal Medicine |
| Singh, Awadhesh Kumar | G.D Hospital & Diabetes Institute | India | Endocrinology & Metabolism | Pharmacology & Pharmacy |
| Taylor, Steven | The University of British Columbia | Canada | Clinical Psychology | Psychiatry |
| Zhou, Fei | China-Japan Friendship Hospital | China | Respiratory System | Microbiology |
| Misra, Anoop | Diabetes Foundation (India), New Delhi | India | Endocrinology & Metabolism | Nutrition & Dietetics |
| Koh, David | Universiti Brunei Darussalam | Brunei Darussalam | Environmental & Occupational Health | General & Internal Medicine |
| Bourouiba, Lydia | Massachusetts Institute of Technology | United States | Fluids & Plasmas | Evolutionary Biology |
| Becker, Richard C. | University of Cincinnati College of Medicine | United States | Cardiovascular System & Hematology | General & Internal Medicine |
| Angus, Derek C. | University of Pittsburgh School of Medicine | United States | General & Internal Medicine | Emergency & Critical Care Medicine |
| Liang, Wenhua | Guangzhou Medical University | China | Oncology & Carcinogenesis | Surgery |
| Phelan, Alexandra L. | Georgetown University | United States | General & Internal Medicine | Applied Ethics |
| Hung, Ivan | The University of Hong Kong Li Ka Shing Faculty of Medicine | Hong Kong | Microbiology | Gastroenterology & Hepatology |
| Munster, Vincent J. | NIAID Rocky Mountain Laboratories | United States | Virology | Microbiology |
| Lai, Chih Cheng | Veterans General Hospital-Kaohsiung Taiwan | Taiwan | Microbiology | Arthritis & Rheumatology |
| Klompas, Michael | Brigham and Women's Hospital | United States | Epidemiology | Microbiology |
| Tandon, Rajiv | Western Michigan University Homer Stryker M.D. School of Medicine | United States | Psychiatry | Neurology & Neurosurgery |
| Wiwanitkit, Viroj | Dr. D.Y. Patil Vidyapeeth Deemed University, Pune | India | Tropical Medicine | General & Internal Medicine |
| Sher, Leo | Icahn School of Medicine at Mount Sinai | United States | Psychiatry | Public Health |
| Goodell, John W. | University of Akron | United States | Finance | Business & Management |
| Lechien, Jerome R. | Université de Mons | Belgium | Otorhinolaryngology | Speech-Language Pathology & Audiology |
| Wang, Chen | Chinese Academy of Medical Sciences & Peking Union Medical College | China | Respiratory System | General & Internal Medicine |
| Kucharski, Adam J. | London School of Hygiene & Tropical Medicine | United Kingdom | Microbiology | General & Internal Medicine |
| Xiang, Yu Tao | University of Macau | China | Psychiatry | Nursing |
| Guarner, Jeannette | Emory University School of Medicine | United States | Pathology | Microbiology |
| Ho, Cyrus S.H. | Yong Loo Lin School of Medicine | Singapore | Toxicology | Psychiatry |
| Huynh, Toan Luu Duc | WHU - Otto Beisheim School of Management | Germany | Economics | Finance |
| Larson, Heidi J. | London School of Hygiene & Tropical Medicine | United Kingdom | Virology | Public Health |
| Brodin, Petter | Karolinska Institutet | Sweden | Immunology | Developmental Biology |
| Raoult, Didier | Aix Marseille Université | France | Microbiology | Tropical Medicine |
| Curigliano, Giuseppe | Università degli Studi di Milano | Italy | Oncology & Carcinogenesis | Pharmacology & Pharmacy |
| Galea, Sandro | School of Public Health | United States | Public Health | Psychiatry |
| Ratten, Vanessa | La Trobe Business School | Australia | Business & Management | Marketing |
| Zhong, Nan shan | Guangzhou Medical University | China | Respiratory System | Oncology & Carcinogenesis |
| Mukhtar, Sonia | University of Management and Technology Lahore | Pakistan | Gender Studies | Sociology |
| Colson, Philippe | Aix Marseille Université | France | Microbiology | Virology |
| Nkengasong, John N. | Africa Centres for Disease Control and Prevention | Ethiopia | Virology | Microbiology |
| Dhama, Kuldeep | Indian Veterinary Research Institute | India | Dairy & Animal Science | Veterinary Sciences |
| Liu, Yingxia | Second Affiliated Hospital of Southern University of Science and Technology | China | Virology | Microbiology |
| Yuen, Kwok Yung | The University of Hong Kong Li Ka Shing Faculty of Medicine | Hong Kong | Microbiology | Virology |
| Naveen, Vankadari | Faculty of Medicine, Nursing and Health Sciences | Australia | Biochemistry & Molecular Biology | Physical Chemistry |
| Cheng, V. C.C. | Queen Mary Hospital Hong Kong | Hong Kong | Microbiology | Epidemiology |
| Khunti, Kamlesh | College of Life Sciences | United Kingdom | Endocrinology & Metabolism | General & Internal Medicine |
| Wu, Zun You | Chinese Center for Disease Control and Prevention | China | Public Health | Virology |
| Hui, David S.C. | Chinese University of Hong Kong | Hong Kong | Respiratory System | Microbiology |
| Liu, Jia | Tongji Medical College | China | Virology | Immunology |
| Gautam, Sneha | Karunya Institute of Technology and Sciences | India | Environmental Sciences | Ecology |
| Rubin, G. James | King's College London | United Kingdom | Psychiatry | Public Health |
| Vaishya, Raju | Indraprastha Apollo Hospitals | India | Orthopedics | General & Internal Medicine |
| Kraemer, Moritz U.G. | University of Oxford | United Kingdom | Tropical Medicine | Microbiology |
| Tang, Julian W. | University of Leicester | United Kingdom | Microbiology | Virology |
| Xiong, Yong | Zhongnan Hospital of Wuhan University | China | Microbiology | Virology |
| Tobin, Martin J. | Loyola University of Chicago | United States | Respiratory System | Emergency & Critical Care Medicine |
| Phan, Tung | University of Pittsburgh Medical Center | United States | Virology | Microbiology |
| Wang, Yeming | China-Japan Friendship Hospital | China | Microbiology | General & Internal Medicine |
| Bikdeli, Behnood | Cardiovascular Research Foundation | United States | Cardiovascular System & Hematology | General & Internal Medicine |
| Mamun, Md Abdullah Al | Centre for Health Innovation, Networking, Training, Action and Research - Bangladesh | Bangladesh | Psychiatry | Nursing |
| Connors, Jean M. | Harvard Medical School | United States | Cardiovascular System & Hematology | Immunology |
| Volkow, Nora D. | National Institute on Alcohol Abuse and Alcoholism (NIAAA) | United States | Neurology & Neurosurgery | Psychiatry |
| Liu, Lei | Second Affiliated Hospital of Southern University of Science and Technology | China | Microbiology | Immunology |
| Wichmann, Dominic | Universitätsklinikum Hamburg-Eppendorf | Germany | Emergency & Critical Care Medicine | Microbiology |
| Wang, Xinghuan | Zhongnan Hospital of Wuhan University | China | Oncology & Carcinogenesis | Biochemistry & Molecular Biology |
| Asmundson, Gordon J.G. | University of Regina | Canada | Clinical Psychology | Psychiatry |
| Baden, Lindsey R. | Brigham and Women's Hospital | United States | Microbiology | General & Internal Medicine |
| Hotez, Peter J. | Baylor College of Medicine | United States | Tropical Medicine | Mycology & Parasitology |
| van Vugt, Michèle | Universiteit van Amsterdam | Netherlands | Tropical Medicine | Microbiology |
| Walls, Alexandra C. | University of Washington | United States | Developmental Biology | Biophysics |
| Wrapp, Daniel | The University of Texas at Austin | United States | Virology | Developmental Biology |
| Galanakis, Charis M. | Galanakis Laboratories | Greece | Food Science | Biotechnology |
| Brufsky, Adam | UPMC Hillman Cancer Center | United States | Oncology & Carcinogenesis | Pathology |
| Shi, Yuan | Children's Hospital of Chongqing Medical University | China | Pediatrics | Neurology & Neurosurgery |
| Poland, Gregory A. | Mayo Clinic | United States | Virology | Immunology |
| van Doremalen, Neeltje | NIAID Rocky Mountain Laboratories | United States | Virology | Microbiology |
| Du, Ronghui | Wuhan First Hospital | China | Respiratory System | Immunology |
| Hopkins, Claire | Guy's and St Thomas' NHS Foundation Trust | United Kingdom | Otorhinolaryngology | General & Internal Medicine |
| Bragazzi, Nicola Luigi | York University | Canada | General & Internal Medicine | Toxicology |
| Wang, Fusheng | General Hospital of People's Liberation Army | China | Gastroenterology & Hepatology | Immunology |
| Mizumoto, Kenji | Graduate School of Advanced Integrated Studies in Human Survivability | Japan | Microbiology | Bioinformatics |
| Kim, Jin Yong | Incheon Medical Center | South Korea | General & Internal Medicine | Microbiology |
| Zhang, Wei | Beijing Ditan Hospital Capital Medical University | China | Virology | Microbiology |
| Ren, Lili | Institute of Pathogen Biology, Chinese Academy of Medical Sciences & Peking Union Medical College | China | Microbiology | Virology |
| Xu, Zhe | General Hospital of People's Liberation Army | China | Microbiology | Oncology & Carcinogenesis |
| Wang, Dawei | Zhongnan Hospital of Wuhan University | China | Emergency & Critical Care Medicine | General & Internal Medicine |
| Carr, Anitra C. | University of Otago, Christchurch | New Zealand | Nutrition & Dietetics | Biochemistry & Molecular Biology |
| Iacobellis, Gianluca | University of Miami Leonard M. Miller School of Medicine | United States | Endocrinology & Metabolism | Cardiovascular System & Hematology |
| Sohrabi, Catrin | The Royal London Hospital | United Kingdom | Surgery | General & Internal Medicine |
| Chung, Michael | Icahn School of Medicine at Mount Sinai | United States | Nuclear Medicine & Medical Imaging | Respiratory System |
| Zhu, Na | Chinese Center for Disease Control and Prevention | China | Virology | Microbiology |
| Leung, Kathy | The University of Hong Kong Li Ka Shing Faculty of Medicine | Hong Kong | Microbiology | General & Internal Medicine |
| Lu, Roujian | Chinese Center for Disease Control and Prevention | China | Virology | Microbiology |
| Shi, Heshui | Tongji Medical College | China | Nuclear Medicine & Medical Imaging | Oncology & Carcinogenesis |
| Horby, Peter W. | Nuffield Department of Medicine | United Kingdom | Microbiology | General & Internal Medicine |
| Wang, Wenling | Chinese Center for Disease Control and Prevention | China | Virology | Microbiology |
| Ashraf, Badar Nadeem | Jiangxi University of Finance and EcoNomics | China | Finance | Economics |
| Varga, Zsuzsanna | UniversitatsSpital Zurich | Switzerland | Oncology & Carcinogenesis | Pathology |
| Lu, Xiaoxia | Tongji Medical College | China | Pediatrics | Neurology & Neurosurgery |
| Stebbing, Justin | Imperial College London | United Kingdom | Oncology & Carcinogenesis | Immunology |
| Asadi-Pooya, Ali A. | Shiraz University of Medical Sciences | United States | Neurology & Neurosurgery | General & Internal Medicine |
| Mehta, Puja | University College London Hospitals NHS Foundation Trust | United Kingdom | Arthritis & Rheumatology | Immunology |
| Qiao, Jie | Peking University Third Hospital | China | Obstetrics & Reproductive Medicine | Oncology & Carcinogenesis |
| Lee, Vernon J.M. | Ministry of Health, Government of Singapore | Singapore | Microbiology | Virology |
| Hellewell, Joel | London School of Hygiene & Tropical Medicine | United Kingdom | General & Internal Medicine | Microbiology |
| Casadevall, Arturo | Johns Hopkins Bloomberg School of Public Health | United States | Microbiology | Immunology |
| Amanat, Fatima | Icahn School of Medicine at Mount Sinai | United States | Microbiology | Immunology |
| Morawska, L. | Queensland University of Technology | Australia | Environmental Sciences | Meteorology & Atmospheric Sciences |
| Petersen, Eskild | Aarhus Universitet | Denmark | Microbiology | Tropical Medicine |
| de Wit, Emmie | NIAID Rocky Mountain Laboratories | United States | Virology | Microbiology |
| del Rio, Carlos | Emory University | United States | Virology | Public Health |
| Poon, Leo L.M. | The University of Hong Kong Li Ka Shing Faculty of Medicine | Hong Kong | Virology | Microbiology |
| Helms, Julie | Les Hôpitaux Universitaires de Strasbourg | France | Emergency & Critical Care Medicine | Neurology & Neurosurgery |
| Coulthard, P. | ?Queen Mary University London | United Kingdom | Dentistry | General & Internal Medicine |
| Griffiths, Mark D. | Nottingham Trent University | United Kingdom | Substance Abuse | Psychiatry |
| Brooks, Samantha K. | King's College London | United Kingdom | Psychiatry | General & Internal Medicine |
| Bhopal, Raj S. | Edinburgh Medical School | United Kingdom | Public Health | General & Internal Medicine |
| Zangrillo, A. | IRCCS San Raffaele Scientific Institute | Italy | Anesthesiology | Emergency & Critical Care Medicine |
| Sette, Alessandro | La Jolla Institute for Immunology | United States | Immunology | Virology |
| Lescure, François Xavier | Hôpital Bichat-Claude-Bernard AP-HP | France | Microbiology | General & Internal Medicine |
| Gössling, Stefan | Linnaeus University, Kalmar | Sweden | Sport, Leisure & Tourism | Logistics & Transportation |
| Chowell, Gerardo | Georgia State University | United States | Microbiology | Bioinformatics |
| Zhang, Sheng | Shanghai Jiao Tong University School of Medicine | China | Oncology & Carcinogenesis | Microbiology |
| Yang, Xiaobo | Tongji Medical College | China | Emergency & Critical Care Medicine | Immunology |
| Pranata, Raymond | Universitas Pelita Harapan | Indonesia | Cardiovascular System & Hematology | Endocrinology & Metabolism |
| Chen, Nanshan | Wuhan Jinyintan Hospital | China | General & Internal Medicine | Oncology & Carcinogenesis |
| Peiris, Malik | HKU-Pasteur Research Pole | Hong Kong | Microbiology | Virology |
| Leung, Char | Deakin University | Australia | Virology | Finance |
| Ali, Nurshad | Shahjalal University of Science and Technology | Bangladesh | Toxicology | Microbiology |
| Topol, Eric | Scripps Translational Science Institute | United States | Cardiovascular System & Hematology | General & Internal Medicine |
| Chen, Yu | Wuhan University | China | Virology | Developmental Biology |
| Zumla, Alimuddin | University College London | United Kingdom | Microbiology | General & Internal Medicine |
| Iba, Toshiaki | Juntendo University Graduate School of Medicine | Japan | Cardiovascular System & Hematology | Emergency & Critical Care Medicine |
| Levin, Michael | Imperial College London | United Kingdom | Pediatrics | Microbiology |
| Edmunds, W. John | London School of Hygiene & Tropical Medicine | United Kingdom | Virology | Microbiology |
| Zhang, Chao | General Hospital of People's Liberation Army | China | Immunology | Microbiology |
| Conti, Pio | University of G. d'Annunzio Chieti and Pescara | Italy | Immunology | Biochemistry & Molecular Biology |
| Ogen, Yaron | Tel Aviv University | Israel | Agronomy & Agriculture | Geological & Geomatics Engineering |
| Wölfel, Roman | Institut für Mikrobiologie der Bundeswehr | Germany | Microbiology | Virology |
| Yao, Hao | Harvard T.H. Chan School of Public Health | United States | Health Policy & Services | Psychiatry |
| Neurath, Markus F. | Universitätsklinikum Erlangen | Germany | Gastroenterology & Hepatology | Immunology |
| Davies, Nicholas G. | London School of Hygiene & Tropical Medicine | United Kingdom | General & Internal Medicine | Microbiology |
| Cao, Xuetao | Nankai University | China | Immunology | Oncology & Carcinogenesis |
| Hobbs, Jill E. | University of Saskatchewan | Canada | Agricultural Economics & Policy | Business & Management |
| Geldsetzer, Pascal | Universität Heidelberg | Germany | General & Internal Medicine | Virology |
| Guo, Li | Institute of Pathogen Biology, Chinese Academy of Medical Sciences & Peking Union Medical College | China | Virology | Microbiology |
| Higgins-Desbiolles, Freya | University of South Australia | Australia | Sport, Leisure & Tourism | International Relations |
| Emanuel, Ezekiel J. | University of Pennsylvania Perelman School of Medicine | United States | General & Internal Medicine | Applied Ethics |
| Bontempi, Elza | Università degli Studi di Brescia | Italy | Applied Physics | Materials |
| Ceriello, Antonio | IRCCS Multimedica | Italy | Endocrinology & Metabolism | Cardiovascular System & Hematology |
| Lam, Tommy T.Y. | The University of Hong Kong, State Key Laboratory of Emerging Infectious Diseases | Hong Kong | Virology | Microbiology |
| Mauvais-Jarvis, Franck | Tulane University School of Medicine | United States | Endocrinology & Metabolism | Developmental Biology |
| Grech, Victor | Mater Dei Hospital | Malta | Pediatrics | General & Internal Medicine |
| Paniz-Mondolfi, Alberto E. | Icahn School of Medicine at Mount Sinai | United States | Microbiology | Virology |
| Bauchner, Howard | Journal of American Medical Association |  | Pediatrics | General & Internal Medicine |
| Sanchis-Gomar, Fabian | Universitat de València | Spain | Cardiovascular System & Hematology | General Clinical Medicine |
| Wang, Cuiyan | Huaibei Coal Industry Teachers College | China | Toxicology | Psychiatry |
| Netea, Mihai G. | Radboud University Nijmegen Medical Centre | Netherlands | Immunology | Microbiology |
| Klok, Frederikus A. | Leiden University Medical Center – LUMC | Netherlands | Cardiovascular System & Hematology | General & Internal Medicine |
| Khan, Suliman | Zhengzhou University | China | Microbiology | Plant Biology & Botany |
| Montemurro, Nicola | Università di Pisa | Italy | Neurology & Neurosurgery | Dentistry |
| Ronco, Claudio | Ospedale San Bortolo | Italy | Urology & Nephrology | Emergency & Critical Care Medicine |
| Drosten, Christian | Charité – Universitätsmedizin Berlin | Germany | Microbiology | Virology |
| Ling, Yun | Fudan University | China | Microbiology | Immunology |
| Meo, Sultan Ayoub | King Saud University Medical College | Saudi Arabia | General & Internal Medicine | Gastroenterology & Hepatology |
| Wang, Manli | Wuhan Institute of Virology Chinese Academy of Sciences | China | Virology | Nanoscience & Nanotechnology |
| Arabi, Yaseen | King Saud bin Abdulaziz University for Health Sciences | Saudi Arabia | Emergency & Critical Care Medicine | General & Internal Medicine |
| Zhou, Wenhao | Children’s Hospital of Fudan University | China | Pediatrics | Neurology & Neurosurgery |
| Vabret, Nicolas | Icahn School of Medicine at Mount Sinai | United States | Immunology | Virology |
| Murthy, Srinivas | The University of British Columbia | Canada | General & Internal Medicine | Emergency & Critical Care Medicine |
| Joob, Beuy | Private Academic Practice | Thailand | Tropical Medicine | Oncology & Carcinogenesis |
| Buckee, Caroline O. | Harvard T.H. Chan School of Public Health | United States | Microbiology | Developmental Biology |
| Bansal, Manish | Medanta Hospital | India | Cardiovascular System & Hematology | General & Internal Medicine |
| Prem, Kiesha | London School of Hygiene & Tropical Medicine | United Kingdom | General & Internal Medicine | Microbiology |
| Mason, Robert J. | National Jewish Health | United States | Respiratory System | Biochemistry & Molecular Biology |
| Binnicker, Matthew J. | Mayo Clinic | United States | Microbiology | Immunology |
| MacIntyre, C. Raina | The Kirby Institute | Australia | Microbiology | Virology |
| Baud, David | Centre Hospitalier Universitaire Vaudois | Switzerland | Obstetrics & Reproductive Medicine | Microbiology |
| Rasmussen, Sonja A. | University of Florida College of Medicine | United States | Genetics & Heredity | Obstetrics & Reproductive Medicine |
| Santosh, Kc | University of South Dakota | United States | Artificial Intelligence & Image Processing | Medical Informatics |
| Fan, Bingwen Eugene | Tan Tock Seng Hospital | Singapore | Cardiovascular System & Hematology | Immunology |
| Bloch, Evan M. | Johns Hopkins School of Medicine | United States | Cardiovascular System & Hematology | Microbiology |
| Xia, Shuai | Fudan University | China | Virology | Medicinal & Biomolecular Chemistry |
| Kampf, Günter | Universitätsmedizin Greifswald | Germany | Epidemiology | Microbiology |
| Spinelli, A. | Humanitas Research Hospital | Italy | Surgery | Gastroenterology & Hepatology |
| Bernheim, Adam | Icahn School of Medicine at Mount Sinai | United States | Nuclear Medicine & Medical Imaging | Microbiology |
| Li, Hui | China-Japan Friendship Hospital | China | Microbiology | Respiratory System |
| Petrosillo, Nicola | IRCCS Istituto Nazionale Malattie Infettive Lazzaro Spallanzani | Italy | Microbiology | General & Internal Medicine |
| Park, Matthew D. | Icahn School of Medicine at Mount Sinai | United States | Immunology | Oncology & Carcinogenesis |
| Chen, Jieliang | Fudan University | China | Virology | Gastroenterology & Hepatology |
| Armitage, Richard | University of Nottingham | United Kingdom | Pediatrics | Public Health |
| Khosravi, Mohsen | Zahedan University of Medical Sciences | Iran | Psychiatry | Neurology & Neurosurgery |
| Tang, Yi Wei | Danaher Diagnostic Platform | China | Microbiology | Virology |
| Jarvis, Christopher I. | London School of Hygiene & Tropical Medicine | United Kingdom | General & Internal Medicine | Microbiology |
| Ng, Siew C. | Chinese University of Hong Kong | Hong Kong | Gastroenterology & Hepatology | Oncology & Carcinogenesis |
| Vaira, Luigi A. | Azienda Ospedaliero Universitaria Sassari | Italy | Otorhinolaryngology | Dentistry |
| Onder, Graziano | Istituto Superiore Di Sanita | Italy | Geriatrics | Gerontology |
| Beigel, John H. | National Institute of Allergy and Infectious Diseases (NIAID) | United States | Microbiology | Virology |
| Bonilla-Aldana, D. Katterine | Fundación Universitaria Autónoma de las Américas | Colombia | Microbiology | Tropical Medicine |
| Memish, Ziad A. | Alfaisal University | Saudi Arabia | General & Internal Medicine | Microbiology |
| Harky, Amer | Liverpool Heart and Chest Hospital | United Kingdom | Cardiovascular System & Hematology | Respiratory System |
| Merad, Miriam | Icahn School of Medicine at Mount Sinai | United States | Immunology | Oncology & Carcinogenesis |
| Viner, R. M. | UCL Great Ormond Street Institute of Child Health | United Kingdom | Pediatrics | General & Internal Medicine |
| Amirian, E. Susan | Rice University | United States | Oncology & Carcinogenesis | Epidemiology |
| Hsueh, Po Ren | National Taiwan University Hospital | Taiwan | Microbiology | General & Internal Medicine |
| Chu, Hin | The University of Hong Kong, State Key Laboratory of Emerging Infectious Diseases | Hong Kong | Virology | Microbiology |
| Goyal, Parag | Weill Cornell Medicine | United States | Cardiovascular System & Hematology | General & Internal Medicine |
| Kim, Hyungjin | Seoul National University College of Medicine | South Korea | Nuclear Medicine & Medical Imaging | Oncology & Carcinogenesis |
| Martinez, Miguel Angel | Hospital Universitari Germans Trias i Pujol | Spain | Virology | Biochemistry & Molecular Biology |
| Javaid, Mohd | Jamia Millia Islamia | India | Operations Research | Materials |
| Grifoni, Alba | La Jolla Institute for Immunology | United States | Immunology | Virology |

Not listed are 30 authors who are journalists writing news stories or editors writing editorials for very prestigious journals (Mahase E, The Lancet , Iacobucci G, Cyranoski D, Livingstone E, Burki T, Day M, Kupferschmidt K, Wise J, Callaway E, Horton R, Ledford H, Cohen J, Dyer O, Webster P, Rosenbaum L, Thornton J, Rimmer A, Rubin R, Mallapaty S, Kirby T, Torjesen I, Tanne J, Abbasi J, The Lancet Infectious Diseases , Zarocostas J, Godlee F, Adam D, The Lancet Oncology, Abbasi K).
